# Supplementary material for: Reduced Graphene Oxide/Organic Dye Composites for Bioelectroconversion of Saccharides: Application for Detection of Saccharides and α-Amylase Assessments
Source: MDPI journal article supplement (doi:10.3390/bios13121020), 2023-12-08
Supplement: s1 [file s1]

## Supplementary material

### Reduced graphene oxide/organic dyes composites for bioelectroconversion of saccharides: application for detection of saccharides and $\alpha$ -amylase assessments

Marius Butkevicius<sup>1</sup>, Justina Gaidukevic<sup>2</sup>, Vidute Gureviciene<sup>1</sup>, Julija Razumiene<sup>1\*</sup>

<sup>1</sup>Department of Bioanalysis, Institute of Biochemistry, Life Sciences Center, Vilnius University, Sauletekio av. 7, LT-10257 Vilnius, Lithuania.

<sup>2</sup>Institute of Chemistry, Faculty of Chemistry and Geosciences, Vilnius University, Naugarduko str. 24, LT-03225 Vilnius, Lithuania.

\*Corresponding author

**Table S1.** Distribution and concentration (at. %) of carbon and oxygen bonds determined by XPS.

| Sample | C sp <sup>2</sup> | C sp <sup>3</sup> | C-O/C-N | C=O/C=N | O-C=O | $\pi$ - $\pi^*$ |
|--------|-------------------|-------------------|---------|---------|-------|-----------------|
| GO     | 13.57             | 19.71             | 32.70   | 21.59   | 10.50 | 1.93            |
| rGO    | 49.34             | 24.62             | 7.09    | 2.97    | 9.38  | 6.59            |
| rGO_CR | 51.89             | 31.16             | 2.87    | 4.55    | 6.40  | 3.16            |
| rGO_NR | 41.48             | 33.3              | 7.26    | 3.83    | 8.96  | 5.18            |
| rGO_MG | 48.43             | 31.95             | 5.01    | 4.47    | 5.10  | 5.05            |

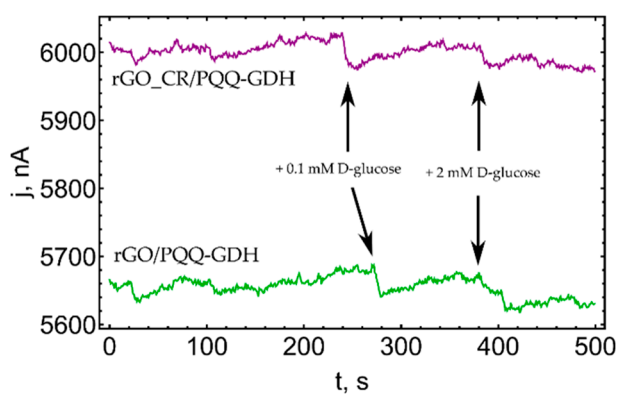

**Figure S1.** Current time responses to D-glucose. Arrows indicate the addition of saccharide. Measurements were performed under potentiostatic conditions at 0.4 V vs. Ag/AgCl in a stirred 50 mM Tris buffer solution containing 100 mM KCl and 5 mM CaCl<sub>2</sub>, pH 7.2, and  $t = 25$  °C. Purple line—rGO\_CR/PQQ-GDH; green—rGO/PQQ-GDH electrode.

**Table S2.** Biosensors characteristics obtained for different saccharides

| rGO_NR/PQQ-GDH |                  |                          |       |                                    |                  |
|----------------|------------------|--------------------------|-------|------------------------------------|------------------|
| Substrate      | $K_m^{app}$ , mM | $V_{max}$ , $\mu A/cm^2$ | $K_i$ | Sensitivity, $\mu A/cm^2 \cdot mM$ | Linear range, mM |
| D-glucose      | 0.327            | 5.71                     | 22.31 | 14.83                              | 0.025 - 0.1      |
| Maltose        | 0.407            | 5.72                     | 16.31 | 11.25                              | 0.025 - 0.1      |
| D-galactose    | 0.264            | 5.17                     | 22.31 | 17.59                              | 0.025 - 0.1      |
| Lactose        | 0.308            | 5.09                     | 6.31  | 14.17                              | 0.025 - 0.1      |
| D-ribose       | 0.431            | 3.48                     | 29.12 | 6.77                               | 0.025 - 0.1      |
| D-xylose       | 0.408            | 6.55                     | 10.30 | 14.27                              | 0.025 - 0.1      |
| Celobiose      | 0.578            | 5.35                     | 10.54 | 8.31                               | 0.025 - 0.15     |
| rGO_MG/PQQ-GDH |                  |                          |       |                                    |                  |
| Substrate      | $K_m^{app}$ , mM | $V_{max}$ , $\mu A/cm^2$ | $K_i$ | Sensitivity, $\mu A/cm^2 \cdot mM$ | Linear range, mM |
| D-glucose      | 0.547            | 24.36                    | 16.31 | 39.01                              | 0.025-0.15       |
| Maltose        | 0.897            | 25.86                    | 14.31 | 20.44                              | 0.025-0.2        |
| D-galactose    | 0.623            | 25.79                    | 21.31 | 35.59                              | 0.025-0.15       |
| Lactose        | 0.958            | 22.01                    | 26.31 | 20.78                              | 0.025-0.2        |
| D-ribose       | 0.848            | 17.91                    | 35.31 | 18.92                              | 0.025-0.2        |
| D-xylose       | 0.481            | 13.14                    | 30.31 | 22.59                              | 0.025-0.15       |
| Celobiose      | 0.618            | 16.98                    | 38.31 | 23.64                              | 0.025-0.15       |

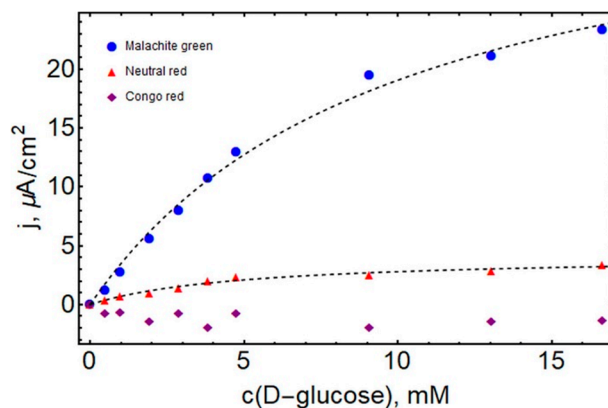**Figure S2.** Calibration curves for rGO/PQQ-GDH electrode obtained using dyes (MG, NR and CR) as additional, soluble mediators. Blue dots—0.25 mM MG; red triangles—0.25 mM NR; purple rhombus—0.25 mM CR. A total of 50 mM Tris buffer solution with 100 mM KCl and 5 mM CaCl<sub>2</sub>, pH 7.2, an applied potential of 0.4 V,  $t = 25\text{ }^{\circ}\text{C}$ .**Table S3.** Extinction coefficients for investigated saccharides.

| Saccharide | $\epsilon$ , $\text{mM}^{-1} \text{cm}^{-1}$ |
|------------|----------------------------------------------|
| D-glucose  | $47 \pm 2$                                   |
| D-xylose   | $70 \pm 3$                                   |
| Maltose    | $85 \pm 3$                                   |

|             |        |
|-------------|--------|
| D-galactose | 48 ± 2 |
| Lactose     | 69 ± 2 |
| Cellobiose  | 90 ± 3 |
| D-ribose    | 43 ± 1 |

**Table S4.** Theoretical composition of saccharide samples.

| Sample | Composition, %                                             |
|--------|------------------------------------------------------------|
| 1      | 33.3 % D-glucose, 33.3 % Maltose, 33.3 % D-xylose          |
| 2      | 50% D-glucose, 50% Maltose                                 |
| 3      | 50% D-glucose, 50% D-xylose                                |
| 4      | 50 % Maltose, 50% D-xylose                                 |
| 5      | 66.7 % D-glucose, 33.3 % D-xylose                          |
| 6      | 80% D-glucose, 20% Maltose                                 |
| 7      | 25% D-glucose, 25% Maltose, 25 % D-xylose, 25% D-galactose |
| 8      | 33.3 % D-galactose, 33.3 % Maltose, 33.3 % Lactose         |
| 9      | 33.3 % Maltose, 66.7 % D-xylose                            |
| 10     | 33.3 % D-glucose, 66.7 % D-galactose                       |
| 11     | 25% D-glucose, 25% Maltose, 25 % D-xylose, 25% D-galactose |
| 12     | 80% D-glucose, 20% Maltose                                 |
| 13     | 33.3 % Maltose, 66.7 % D-xylose                            |
| 14     | 66.7 % D-glucose, 33.3 % D-xylose                          |

**Table S5.** Comparison of theoretical and calculated amounts of D-glucose, Maltose, and D-xylose utilizing amperometric biosensor responses and spectrophotometric analysis.

| Theoretical concentration, mM |       | Amperometric biosensor |                              | Spectrophotometric analysis |                              |
|-------------------------------|-------|------------------------|------------------------------|-----------------------------|------------------------------|
|                               |       | Response, nA           | Calculated concentration, mM | Absorbance                  | Calculated concentration, mM |
| D-glucose                     | 0.025 | 43±3                   | 0.026 ±0.002                 | 0.071 ± 0.012               | 0.024 ± 0.004                |
|                               | 0.05  | 84 ± 5                 | 0.052 ± 0.03                 | 0.130 ± 0.015               | 0.044 ± 0.006                |
|                               | 0.075 | 126 ± 6                | 0.078 ± 0.004                | 0.206 ± 0.016               | 0.070 ± 0.006                |
|                               | 0.1   | 161 ± 8                | 0.100 ± 0.005                | 0.293 ± 0.01                | 0.100 ± 0.004                |
|                               | 0.15  | 240 ± 6                | 0.149 ± 0.004                | 0.423 ± 0.009               | 0.144 ± 0.003                |
|                               | 0.2   | 337 ± 5                | 0.209 ± 0.003                | 0.57 ± 0.01                 | 0.196 ± 0.003                |
| Maltose                       | 0.025 | 32 ± 4                 | 0.025 ± 0.003                | 0.142 ± 0.02                | 0.027 ± 0.004                |
|                               | 0.05  | 66 ± 4                 | 0.050 ± 0.003                | 0.248 ± 0.012               | 0.047 ± 0.002                |
|                               | 0.075 | 94 ± 5                 | 0.071 ± 0.004                | 0.412 ± 0.016               | 0.078 ± 0.003                |
|                               | 0.1   | 132 ± 2                | 0.100 ± 0.002                | 0.529 ± 0.016               | 0.100 ± 0.003                |
|                               | 0.15  | 191 ± 3                | 0.144 ± 0.002                | 0.797 ± 0.025               | 0.151 ± 0.005                |
|                               | 0.2   | 276 ± 6                | 0.209 ± 0.005                | 1.050 ± 0.02                | 0.199 ± 0.004                |
| D-xylose                      | 0.025 | 23 ± 2                 | 0.023 ± 0.002                | 0.123 ± 0.016               | 0.028 ± 0.004                |

|  |       |         |               |               |               |
|--|-------|---------|---------------|---------------|---------------|
|  | 0.05  | 45 ± 1  | 0.045 ± 0.001 | 0.230 ± 0.023 | 0.053 ± 0.005 |
|  | 0.075 | 72 ± 5  | 0.072 ± 0.005 | 0.336 ± 0.039 | 0.077 ± 0.009 |
|  | 0.1   | 100 ± 5 | 0.100 ± 0.005 | 0.436 ± 0.011 | 0.100 ± 0.003 |
|  | 0.15  | 147 ± 8 | 0.147 ± 0.008 | 0.662 ± 0.028 | 0.152 ± 0.006 |
|  | 0.2   | 198 ± 5 | 0.198 ± 0.005 | 0.868 ± 0.027 | 0.199 ± 0.006 |

**Table S6.** Concentrations of saccharides obtained by the amperometric biosensor and using spectrophotometric analysis.

| Sample Nr. | Theoretical concentration, mM | Amperometric biosensor |               | Spectrophotometric analysis |               |
|------------|-------------------------------|------------------------|---------------|-----------------------------|---------------|
|            |                               | Measured               | Recalculated* | Measured                    | Recalculated* |
| 1          | 0.1                           | 0.086 ± 0.005          | 0.107 ± 0.005 | 0.140 ± 0.005               | 0.096 ± 0.005 |
| 2          | 0.1                           | 0.088 ± 0.004          | 0.108 ± 0.004 | 0.126 ± 0.007               | 0.091 ± 0.007 |
| 3          | 0.1                           | 0.091 ± 0.006          | 0.115 ± 0.006 | 0.118 ± 0.001               | 0.092 ± 0.001 |
| 4          | 0.1                           | 0.070 ± 0.002          | 0.106 ± 0.002 | 0.155 ± 0.004               | 0.093 ± 0.004 |
| 5          | 0.12                          | 0.115 ± 0.004          | 0.125 ± 0.004 | 0.134 ± 0.003               | 0.112 ± 0.003 |
| 6          | 0.05                          | 0.054 ± 0.002          | 0.041 ± 0.002 | 0.061 ± 0.004               | 0.053 ± 0.004 |
| 7          | 0.08                          | 0.079 ± 0.002          | 0.100 ± 0.002 | 0.102 ± 0.002               | 0.076 ± 0.002 |
| 8          | 0.075                         | 0.061 ± 0.002          | 0.086 ± 0.002 | 0.142 ± 0.003               | 0.100 ± 0.003 |
| 9          | 0.1                           | 0.075 ± 0.002          | 0.115 ± 0.002 | 0.159 ± 0.004               | 0.096 ± 0.004 |
| 10         | 0.15                          | 0.150 ± 0.003          | 0.152 ± 0.003 | 0.134 ± 0.006               | 0.132 ± 0.006 |
| 11         | 0.04                          | 0.031 ± 0.003          | 0.038 ± 0.003 | 0.051 ± 0.004               | 0.028 ± 0.004 |
| 12         | 0.025                         | 0.022 ± 0.003          | 0.023 ± 0.003 | 0.030 ± 0.003               | 0.019 ± 0.003 |
| 13         | 0.025                         | 0.023 ± 0.004          | 0.026 ± 0.004 | 0.040 ± 0.003               | 0.016 ± 0.003 |
| 14         | 0.03                          | 0.026 ± 0.002          | 0.030 ± 0.002 | 0.034 ± 0.002               | 0.032 ± 0.002 |

\* Equation S1 and S2 was used to recalculate concentration value to take into account the different specificity of the substrate or the different extinction coefficient

$$c_{analyte} = \frac{c_0}{j_0} * \sum_{i=1}^n \frac{j * x}{sp} + \dots + \frac{j * x_n}{sp_n} \quad (S1)$$

$$c_{analyte} = \sum_{i=1}^n \frac{A * x}{\varepsilon} + \dots + \frac{A * x_n}{\varepsilon_n} \quad (S2)$$

Here,  $c_0$ —analyte concentration used for calibration;  $j_0$ —response for  $c_0$ ;  $sp$ —specificity for substrate;  $j$ —response for sample;  $x$ —part of the saccharide in the analyzed sample;  $A$ —absorbance;  $\varepsilon$ —extinction coefficient.

**Table S7.** Comparative performance of bioelectrode based on PQQ-GDH toward D-glucose.

| Electrode                 | Linear range, mM | Sensitivity, $\mu\text{A mM}^{-1} \text{cm}^{-2}$ | Selectivity for other saccharides | Stability         | Reference |
|---------------------------|------------------|---------------------------------------------------|-----------------------------------|-------------------|-----------|
| PQQ-GDH/ferricyanide/CNTs | 1-35             | 31.0                                              | n/a                               | 87% after 28 days | [1]       |
| GDH/PQQ@4-APPA-SWCNT-GC   | 0.01-0.3         | 13.9                                              | n/a                               | 89% after 1 day   | [2]       |
| PQQ-GDH/ Carbon paste-SPE | 0.1-0.6          | 7.2                                               | Nonselective                      | 17% after 25 days | [3]       |
| rGO_MG/PQQ-GDH            | 0.025-0.15       | 39                                                | Nonselective                      | 80% after 20 days | This work |

#### Reference

- Li, G.; Xu, H.; Huang, W.; Wang, Y.; Wu, Y.; Parajuli, R. A Pyrrole Quinoline Quinone Glucose Dehydrogenase Biosensor Based on Screen-Printed Carbon Paste Electrodes Modified by Carbon Nanotubes. *Meas Sci Technol* **2008**, *19*, 065203, doi:10.1088/0957-0233/19/6/065203.
- Quintero-Jaime, A.F.; Conzuelo, F.; Cazorla-Amorós, D.; Morallón, E. Pyrroloquinoline Quinone-Dependent Glucose Dehydrogenase Bioelectrodes Based on One-Step Electrochemical Entrapment over Single-Wall Carbon Nanotubes. *Talanta* **2021**, *232*, 122386, doi:10.1016/j.talanta.2021.122386.
- Razumiene, J.; Vilkanauskite, A.; Gureviciene, V.; Barkauskas, J.; Meskys, R.; Laurinavicius, V. Direct Electron Transfer between PQQ Dependent Glucose Dehydrogenases and Carbon Electrodes: An Approach for Electrochemical Biosensors. *Electrochim Acta* **2006**, *51*, 5150–5156, doi:10.1016/j.electacta.2006.03.058.
